# Supplementary material
Source: ML conference proceedings conference paper supplement (https://openreview.net/forum?id=cdZ6c0KahUO)

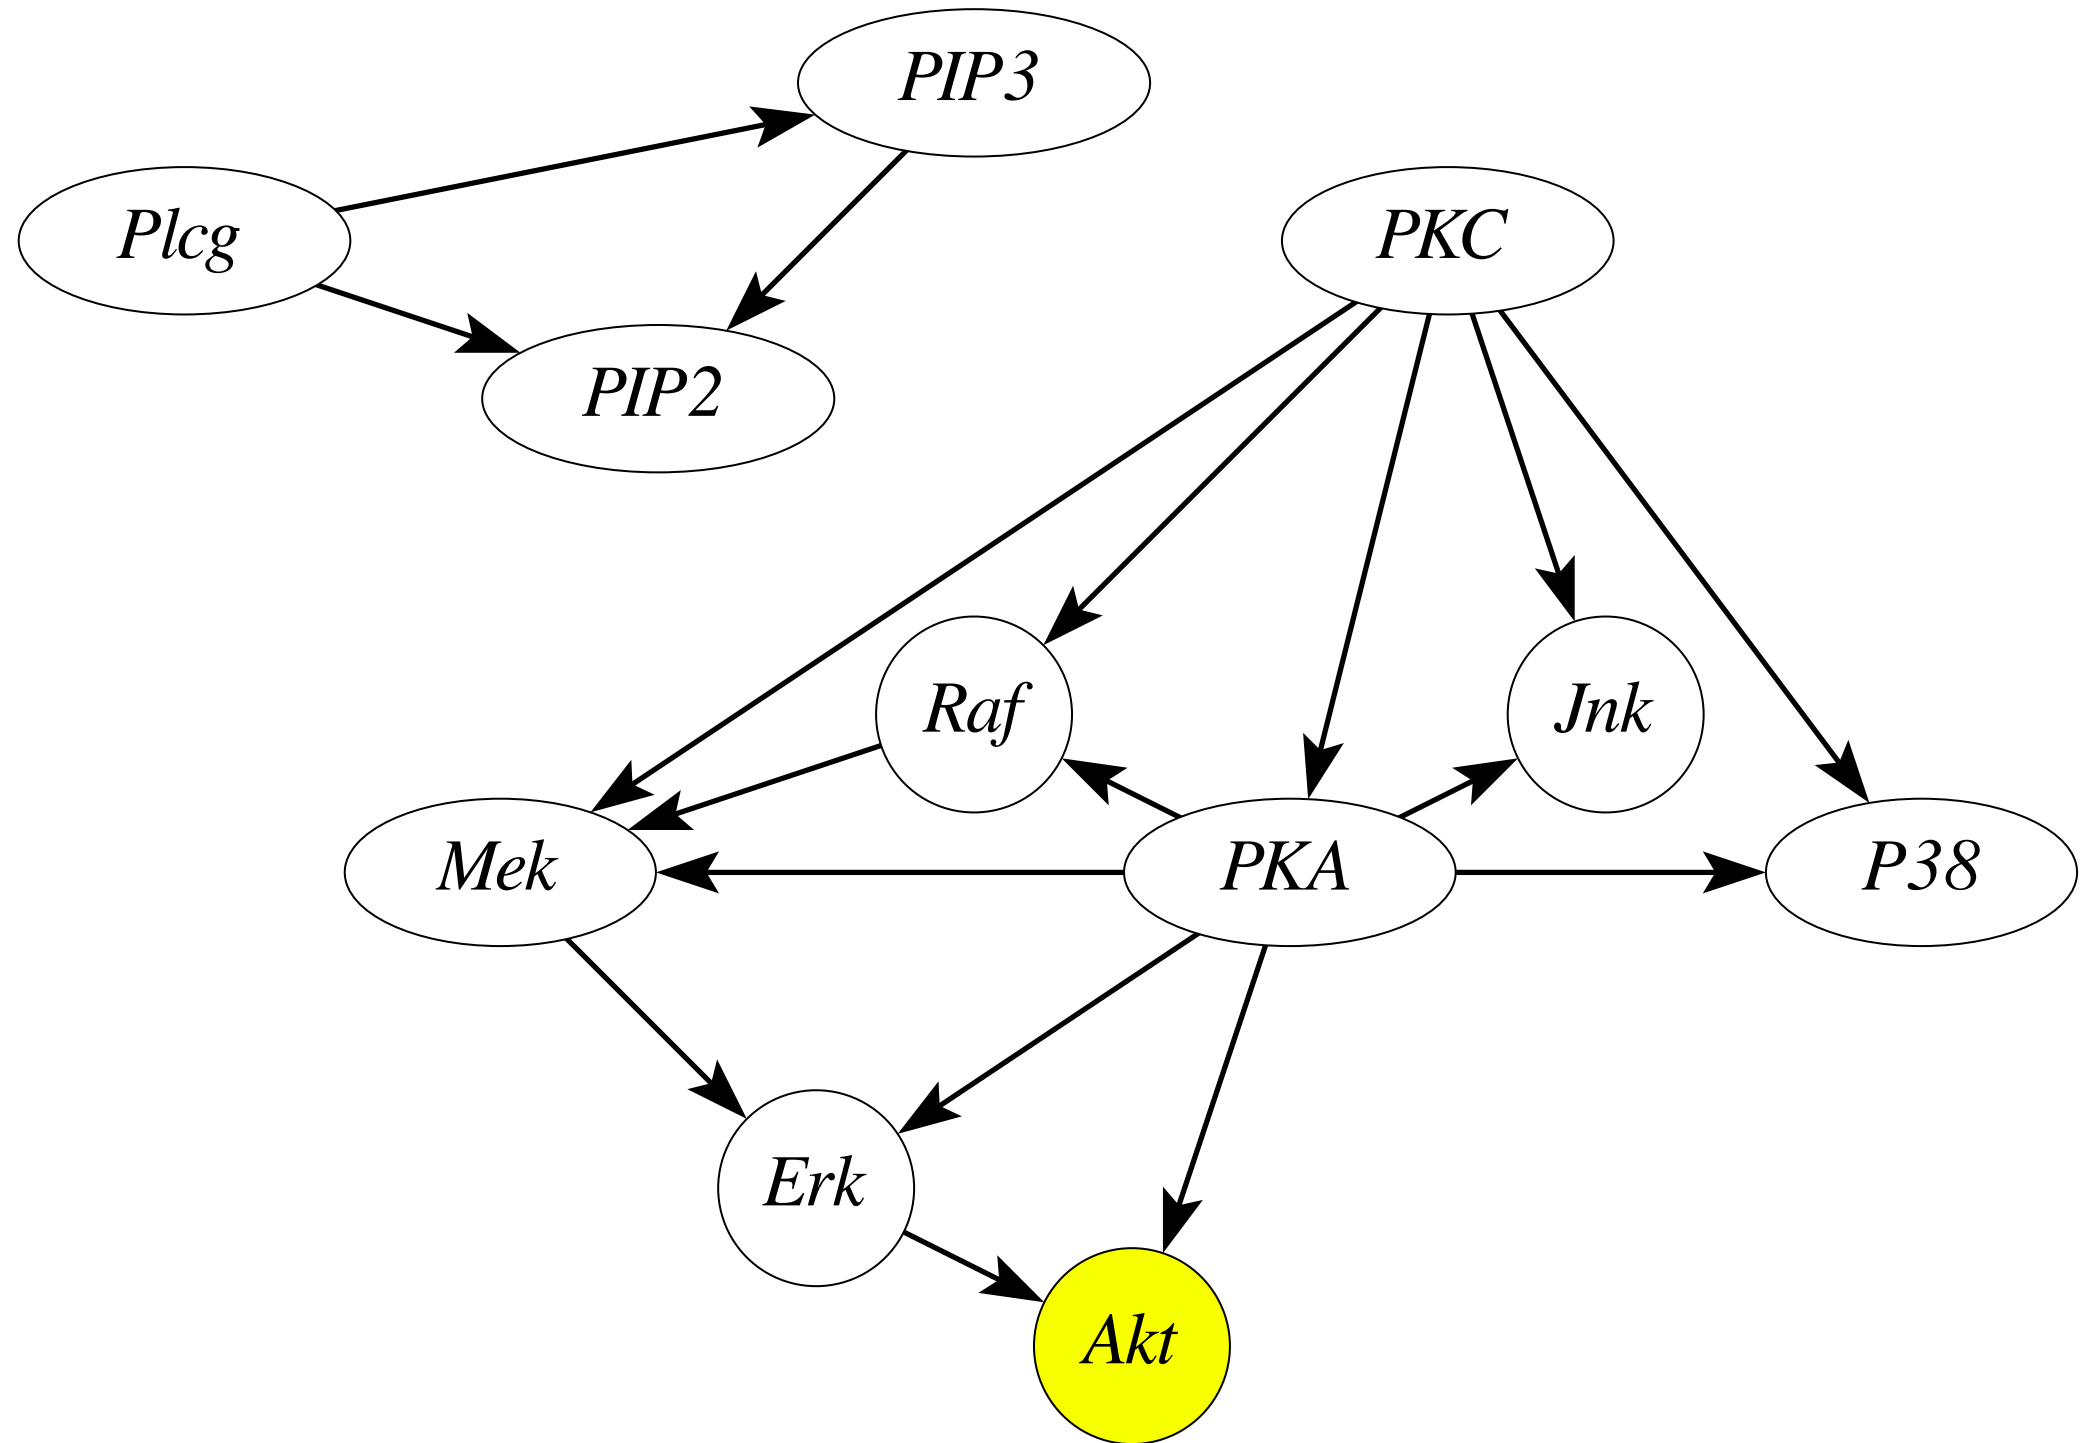

Supplement: supplementary_material [file attachment]

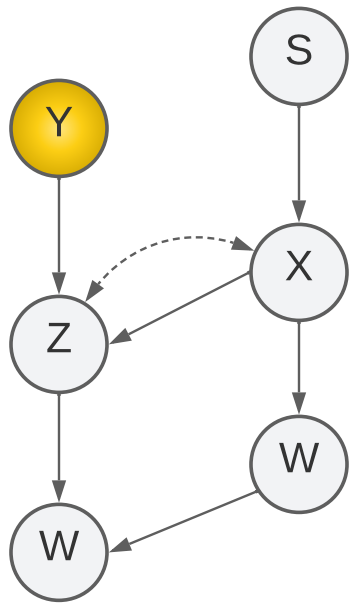

(a)

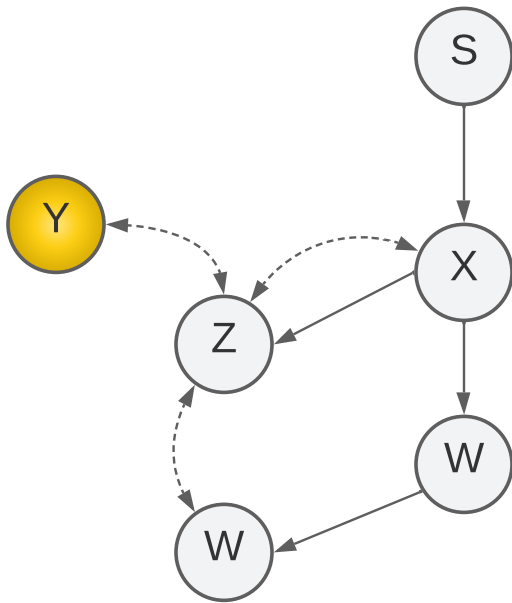

(b)

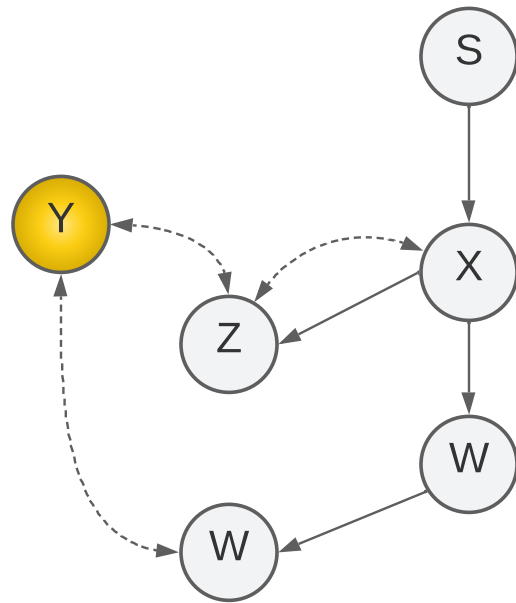

(c)

Supplement: supplementary_material [file attachment]

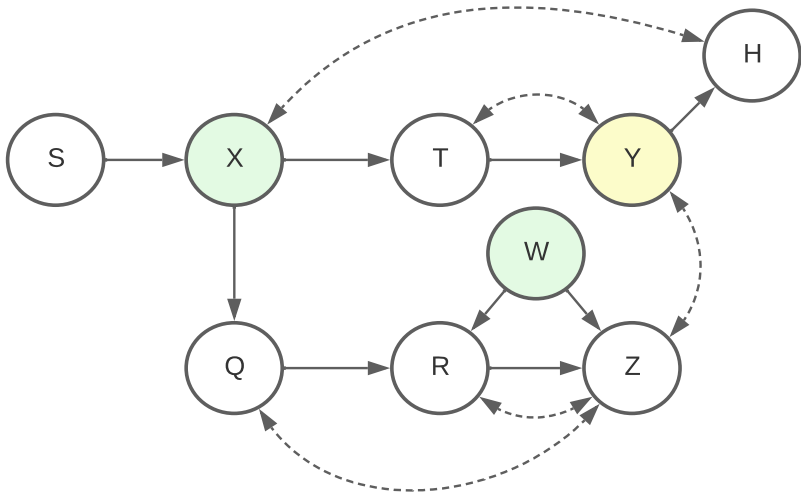

Supplement: supplementary_material [file attachment]

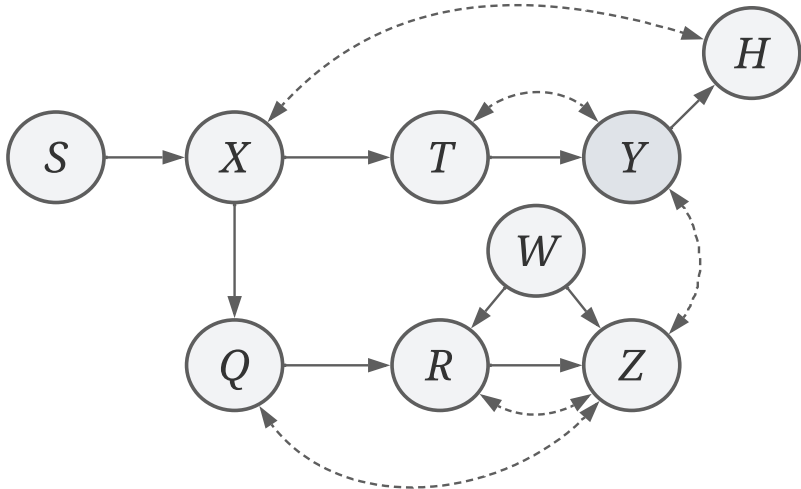

Supplement: supplementary_material [file attachment]

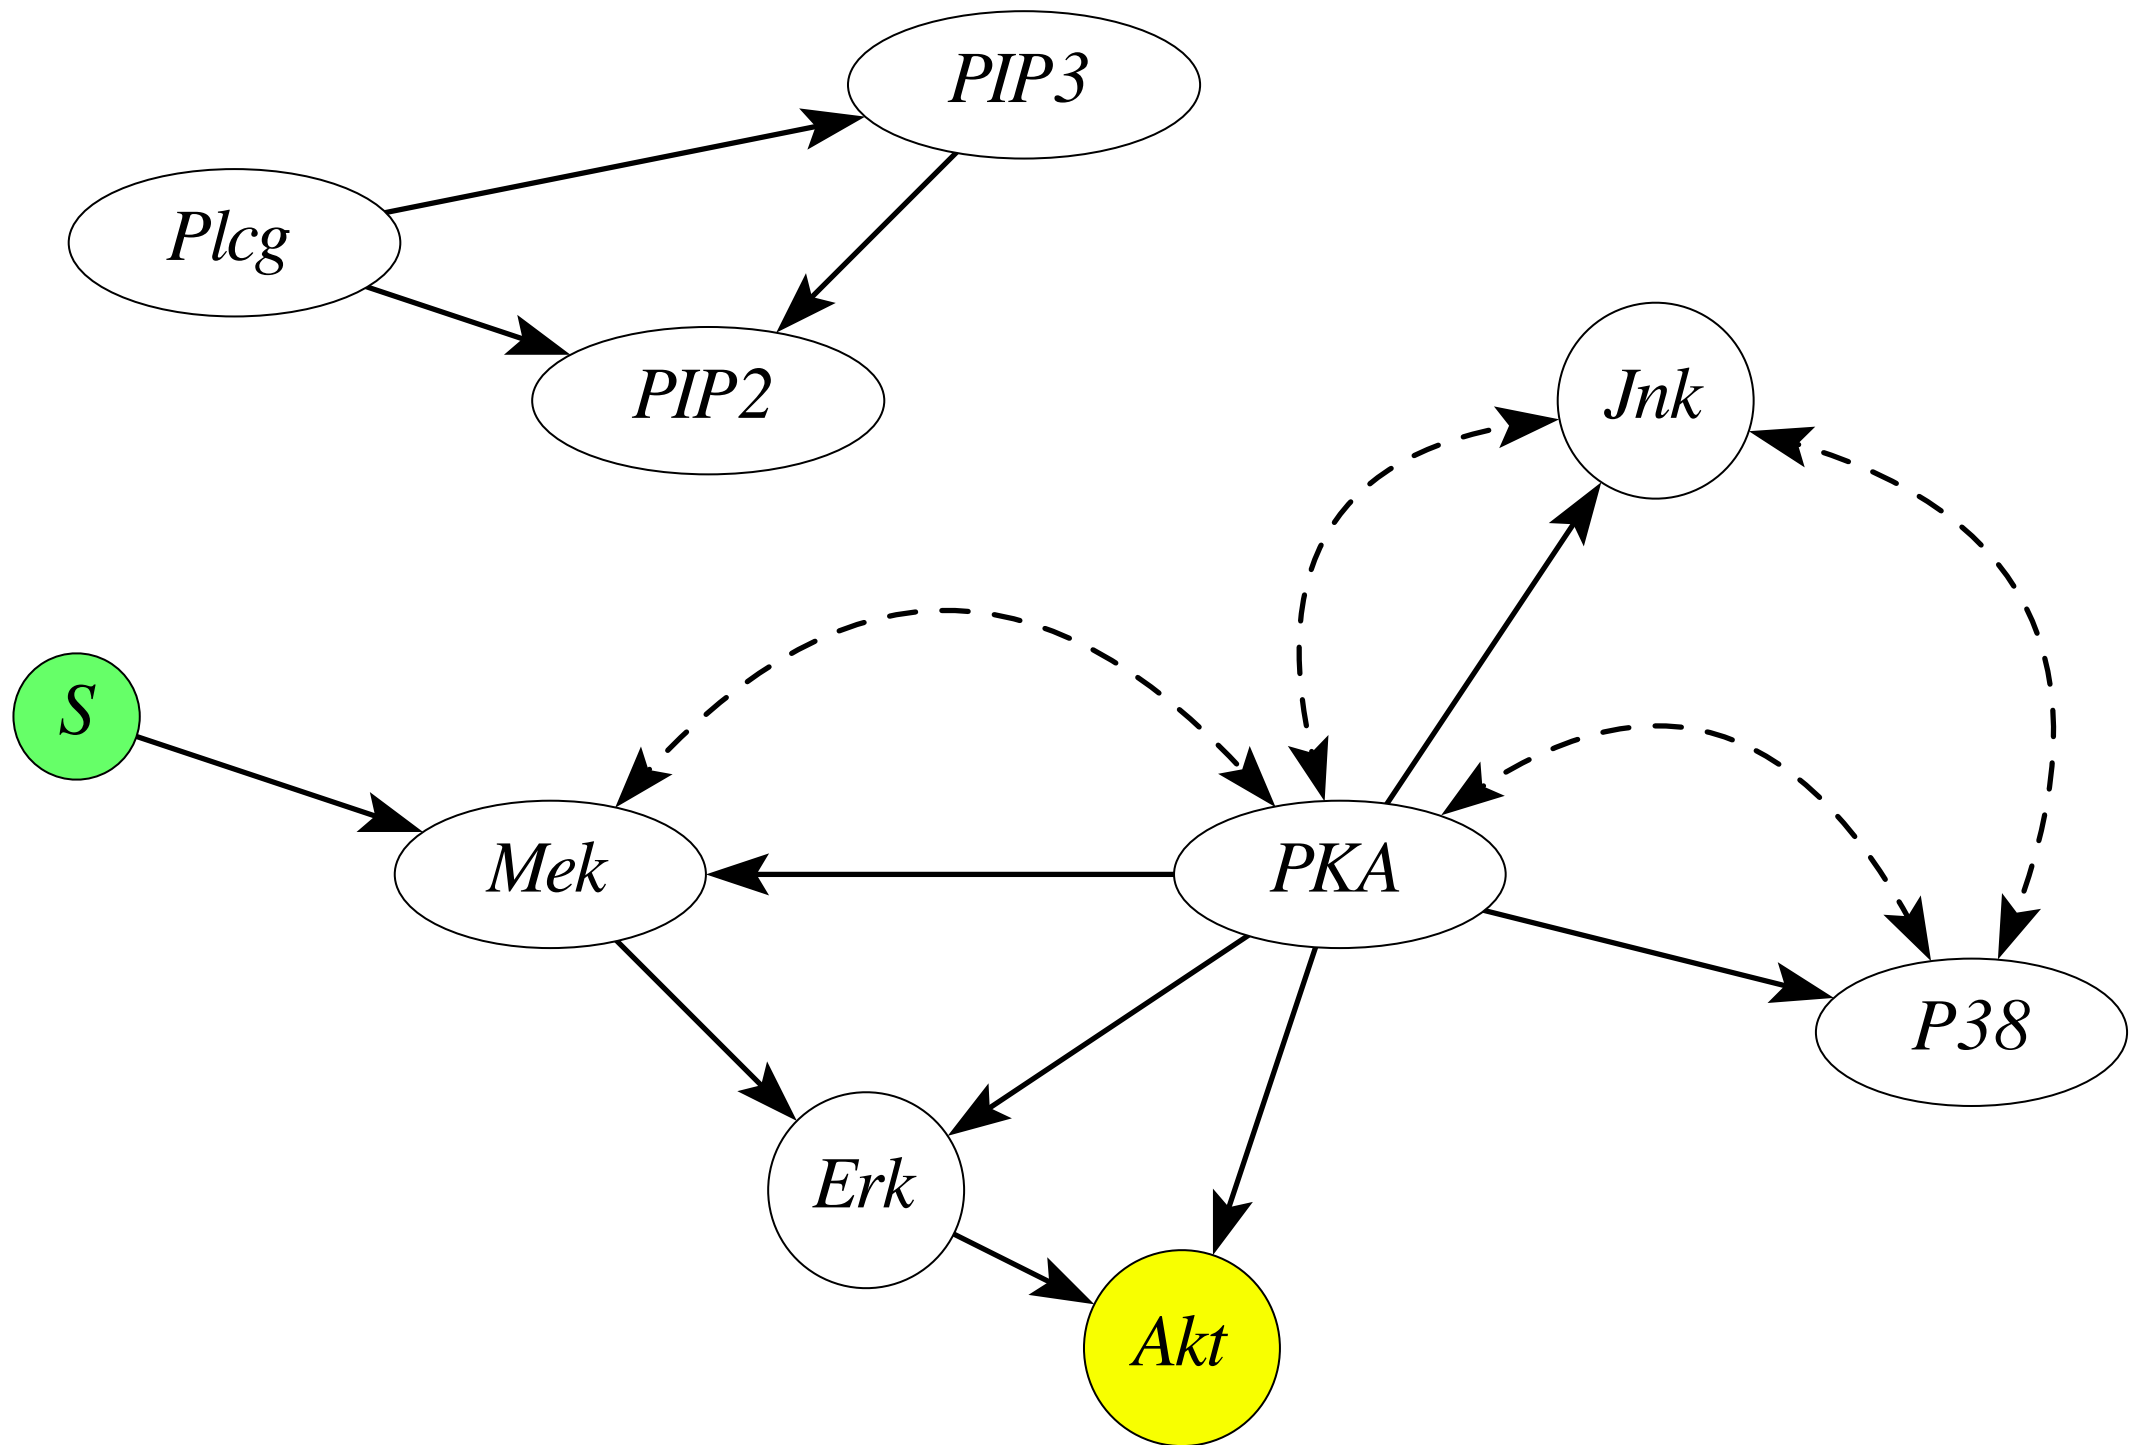

Supplement: supplementary_material [file attachment]

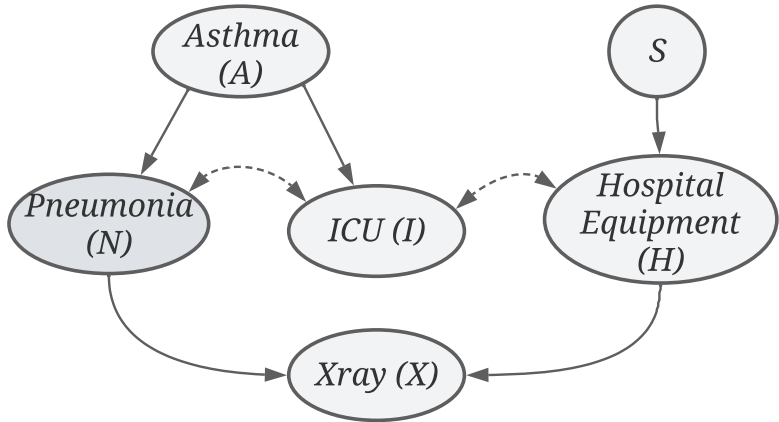

Supplement: supplementary_material [file attachment]

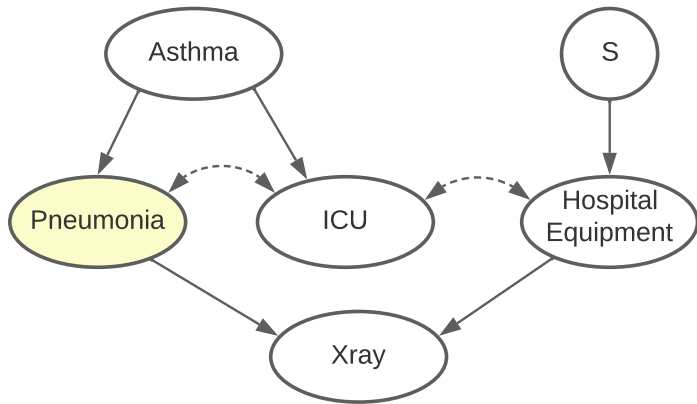

Supplement: supplementary_material [file attachment]

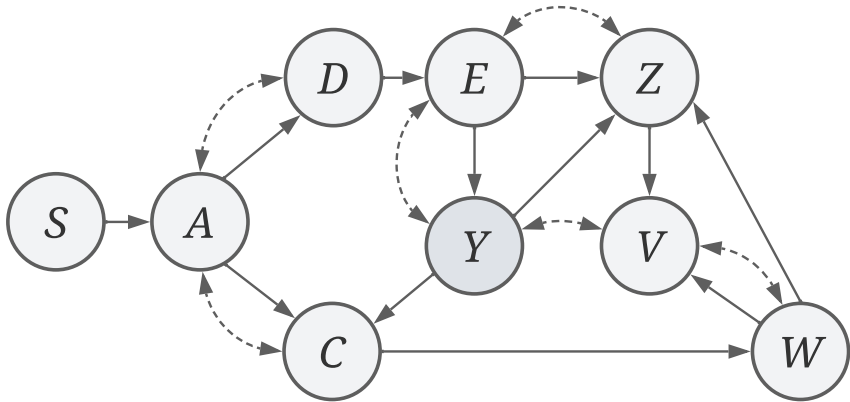

Supplement: supplementary_material [file attachment]

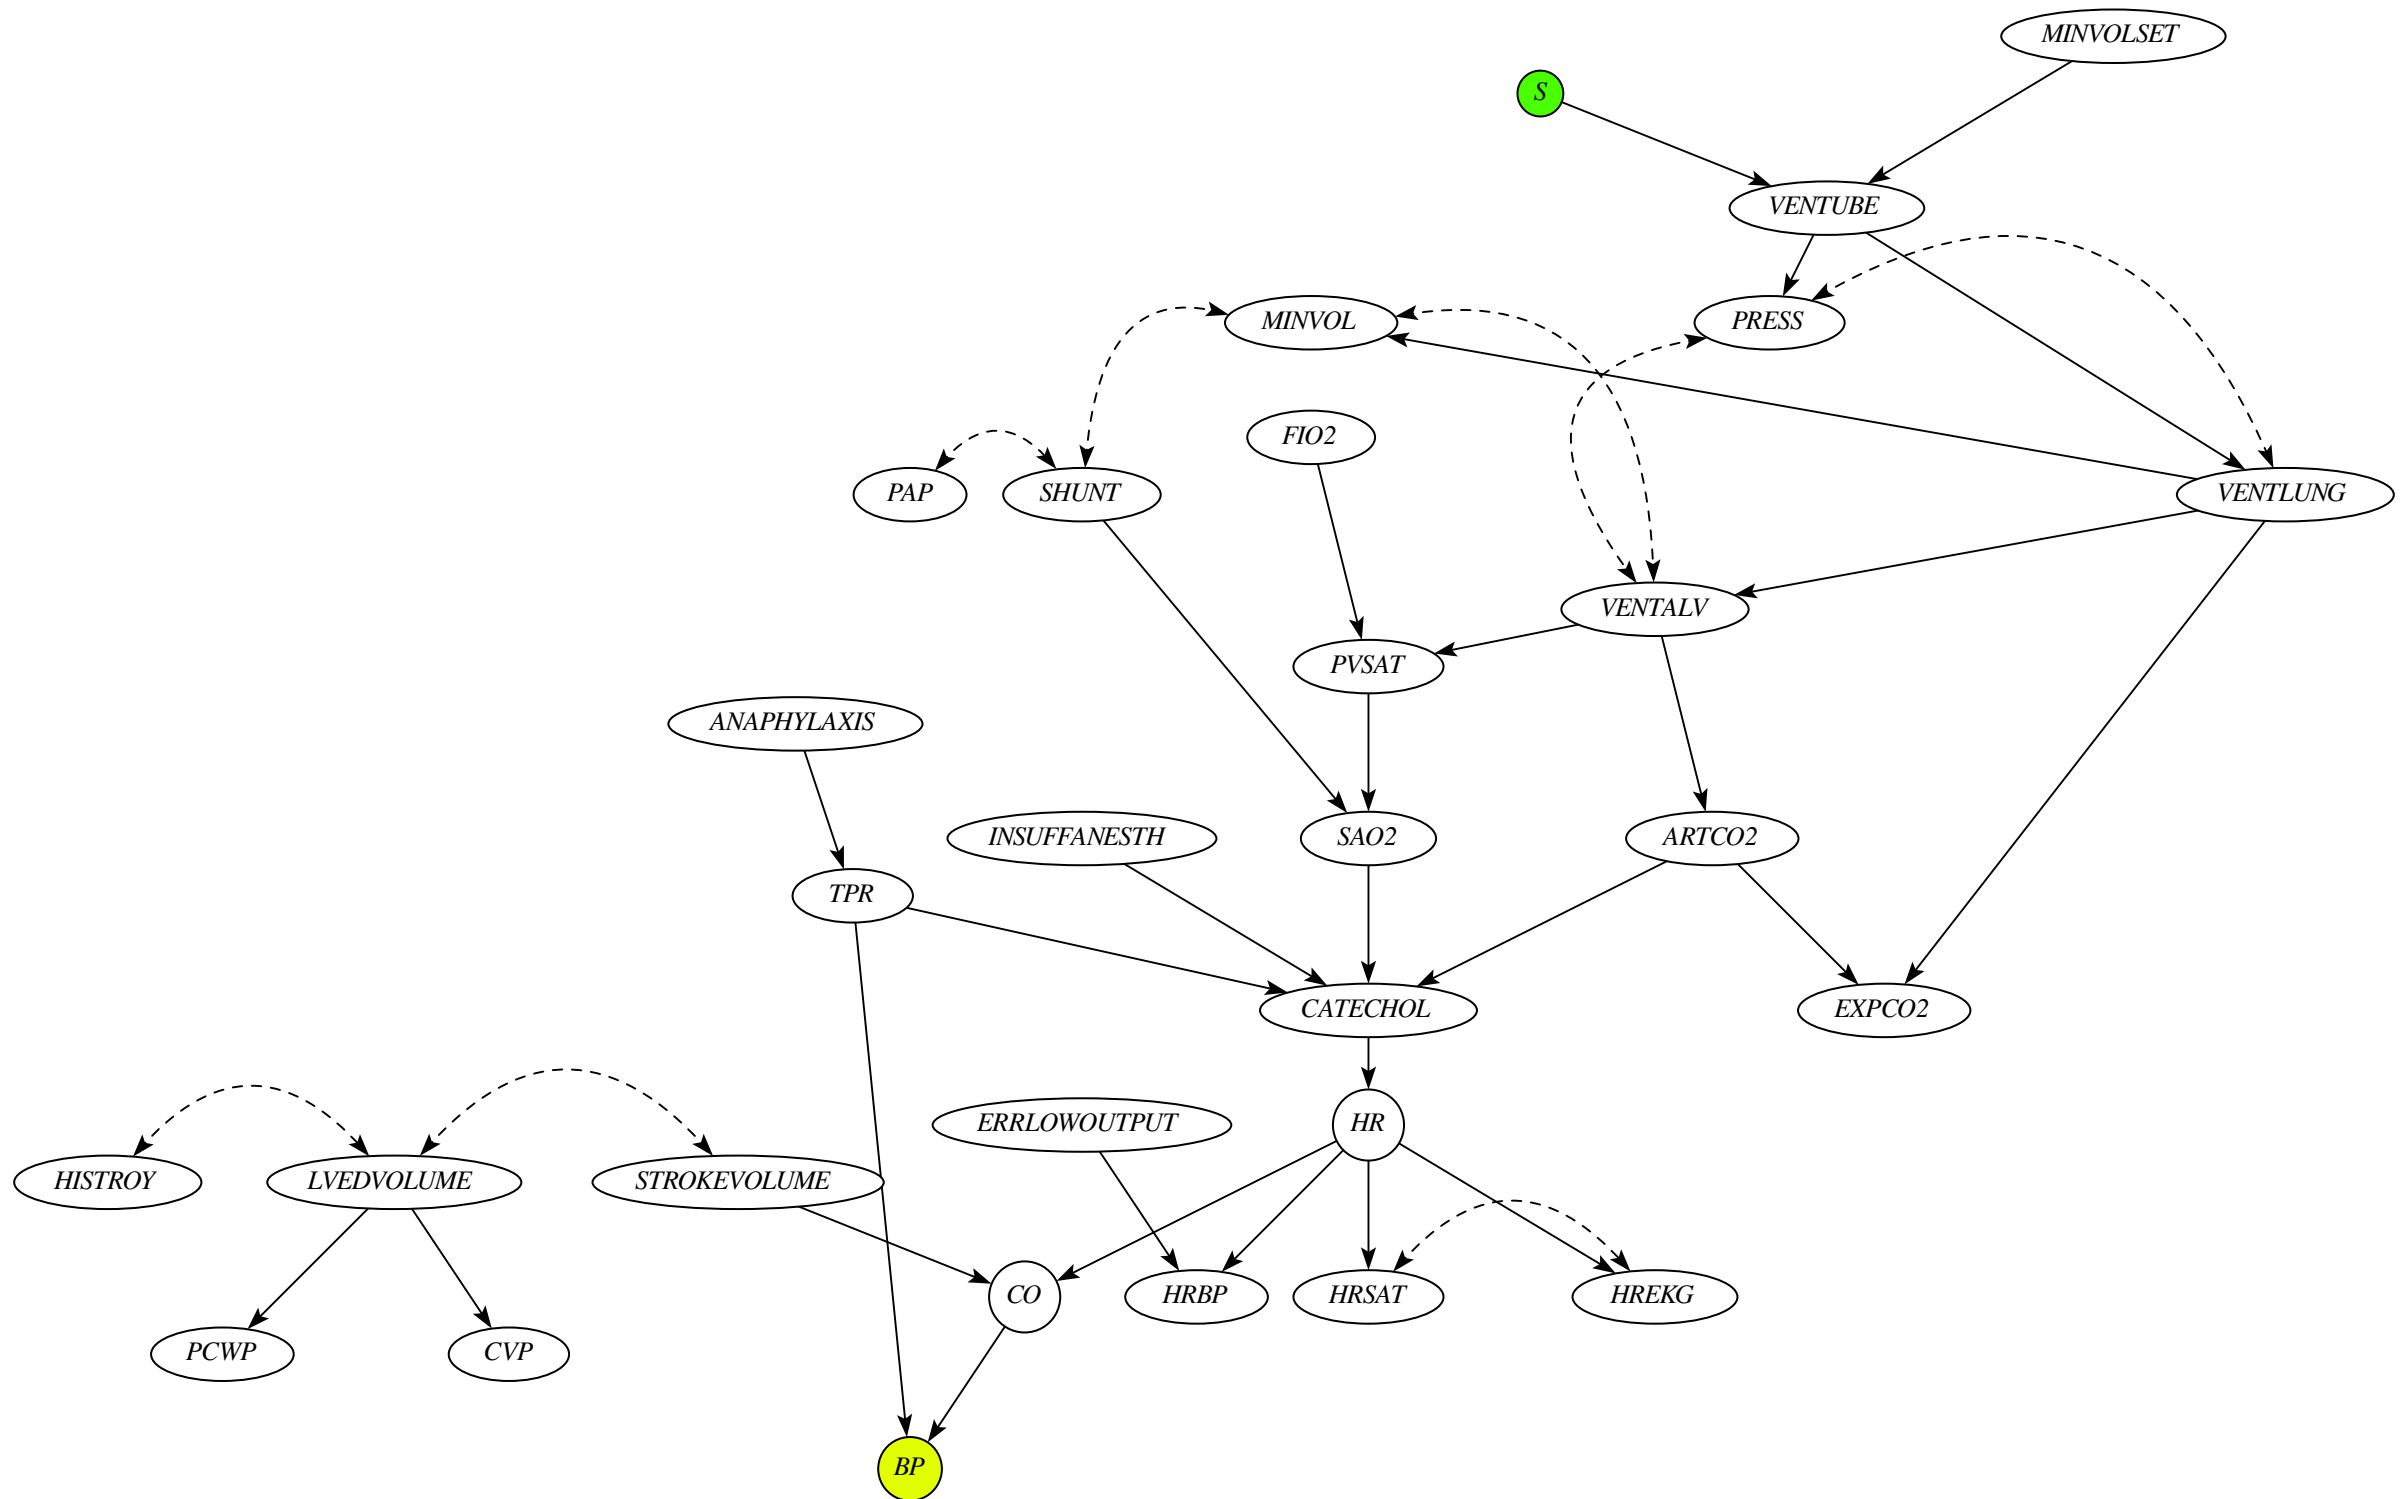

Supplement: supplementary_material [file attachment]

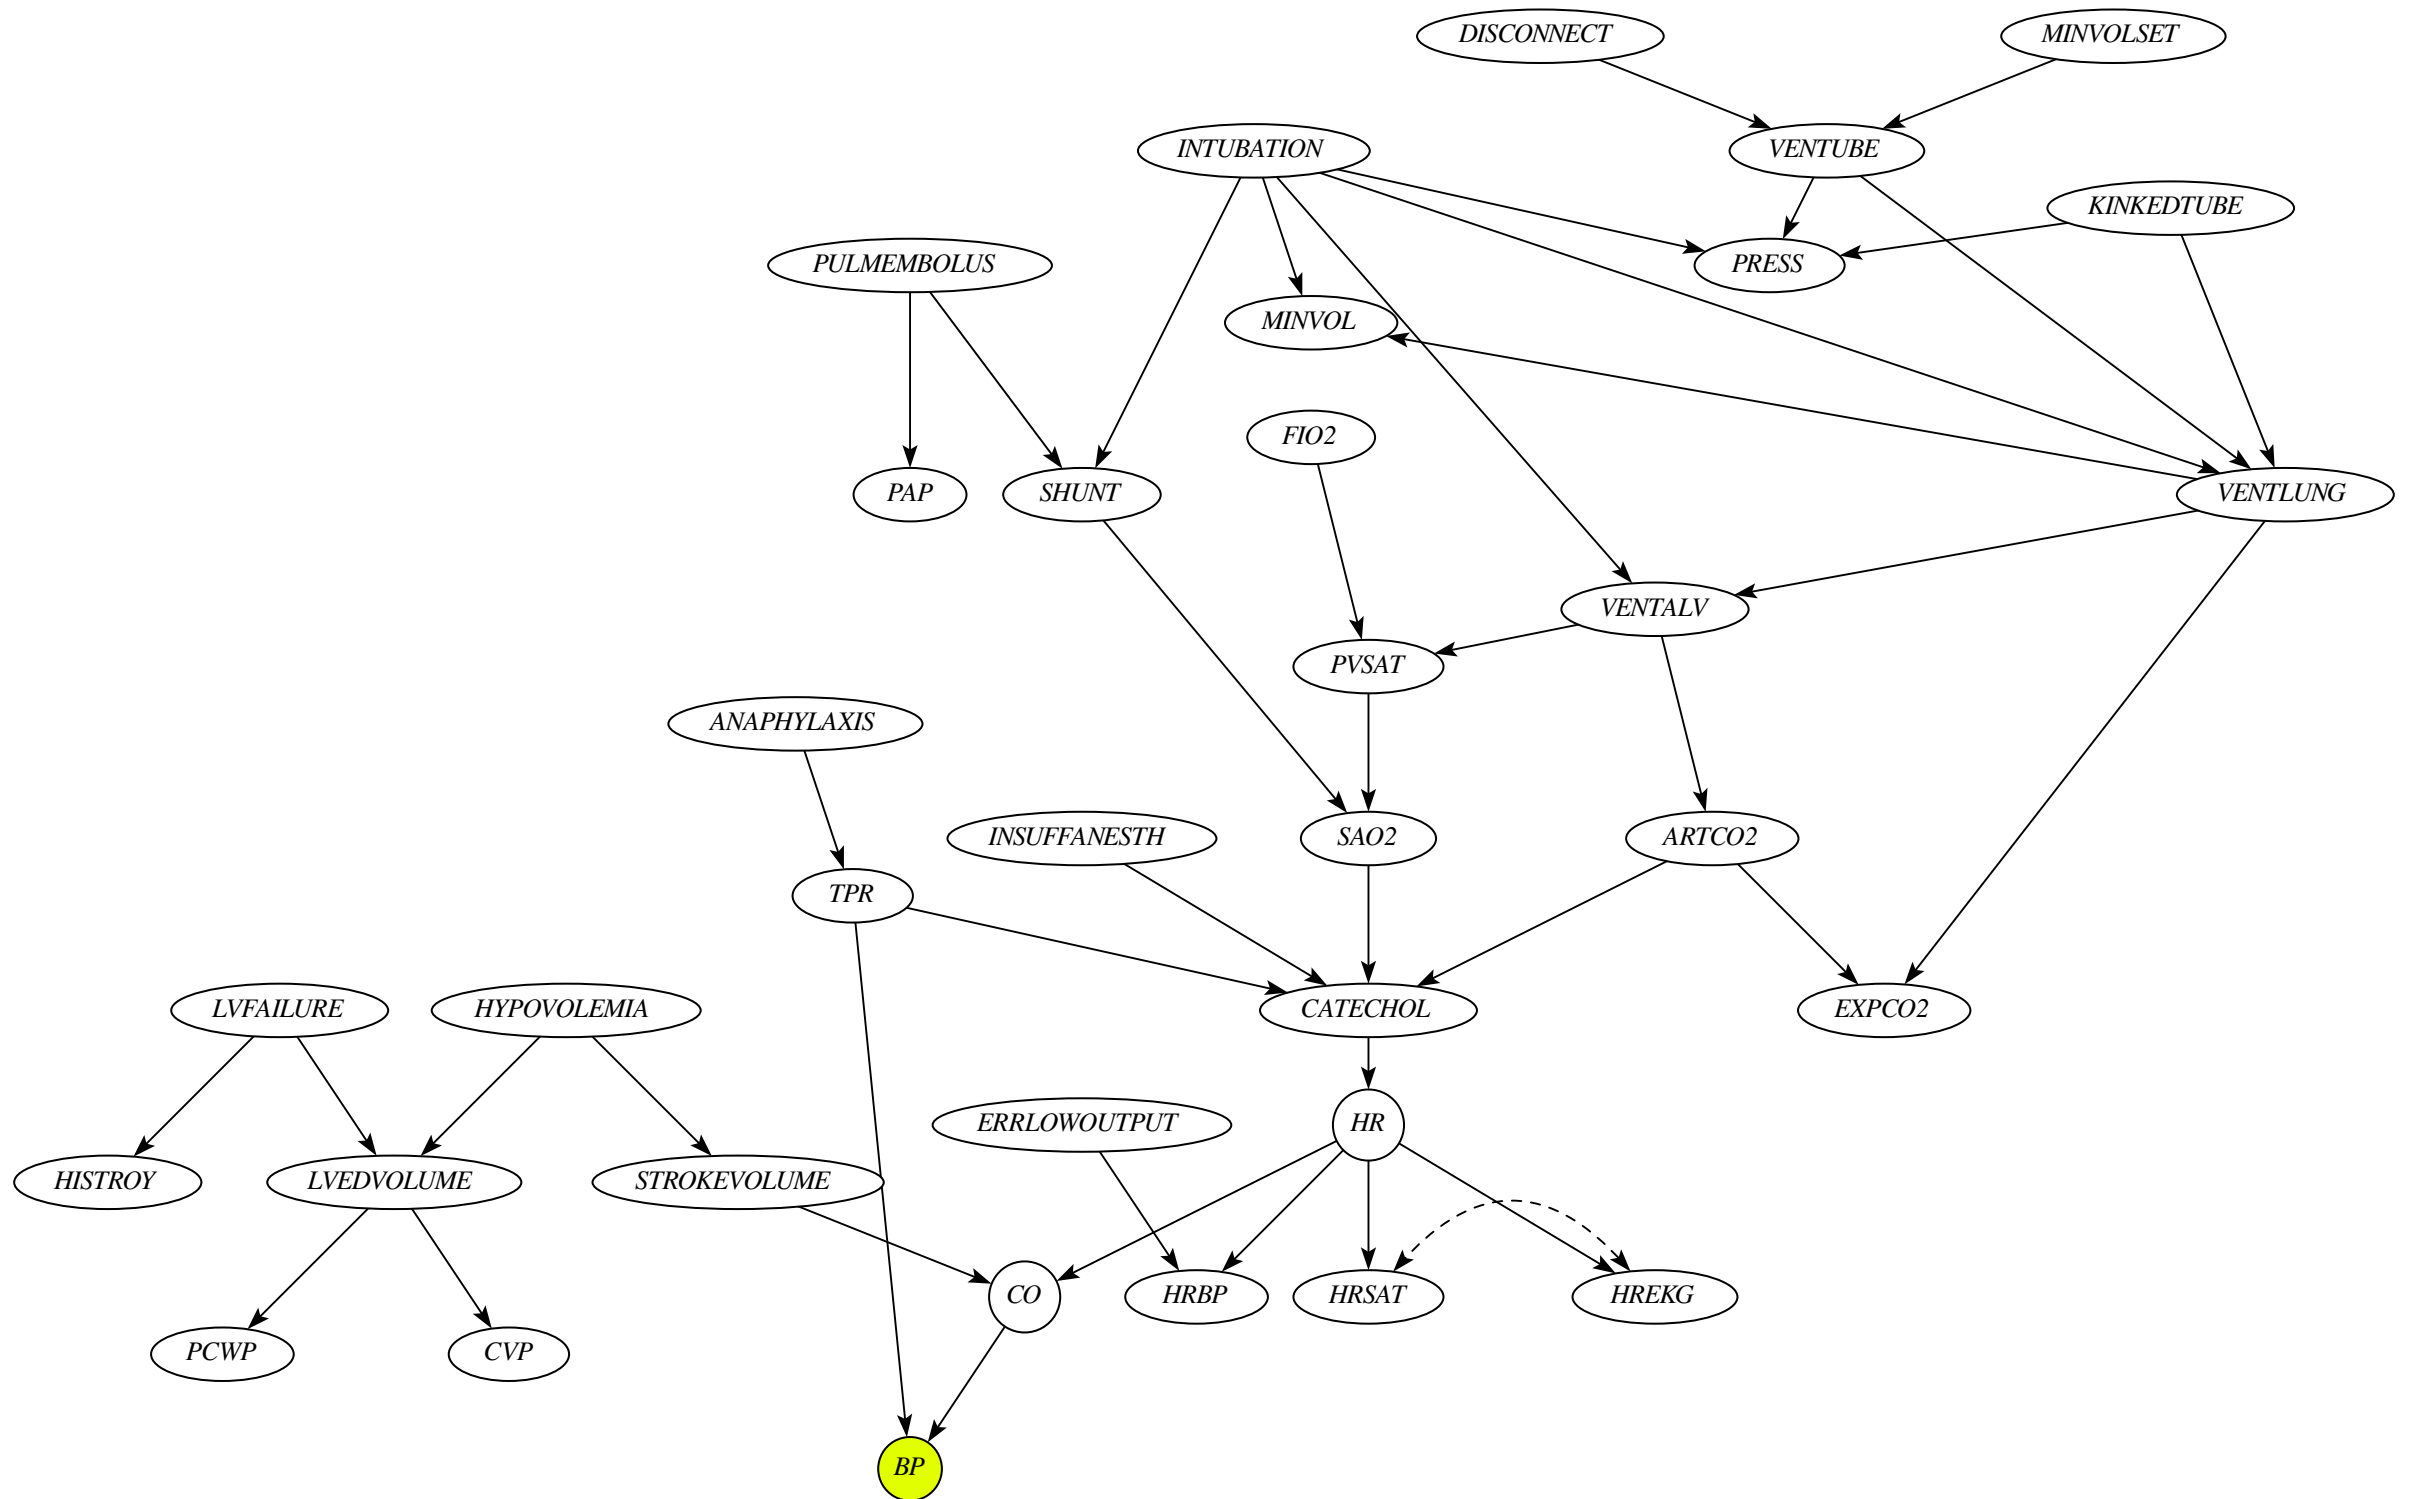

Supplement: supplementary_material [file attachment]

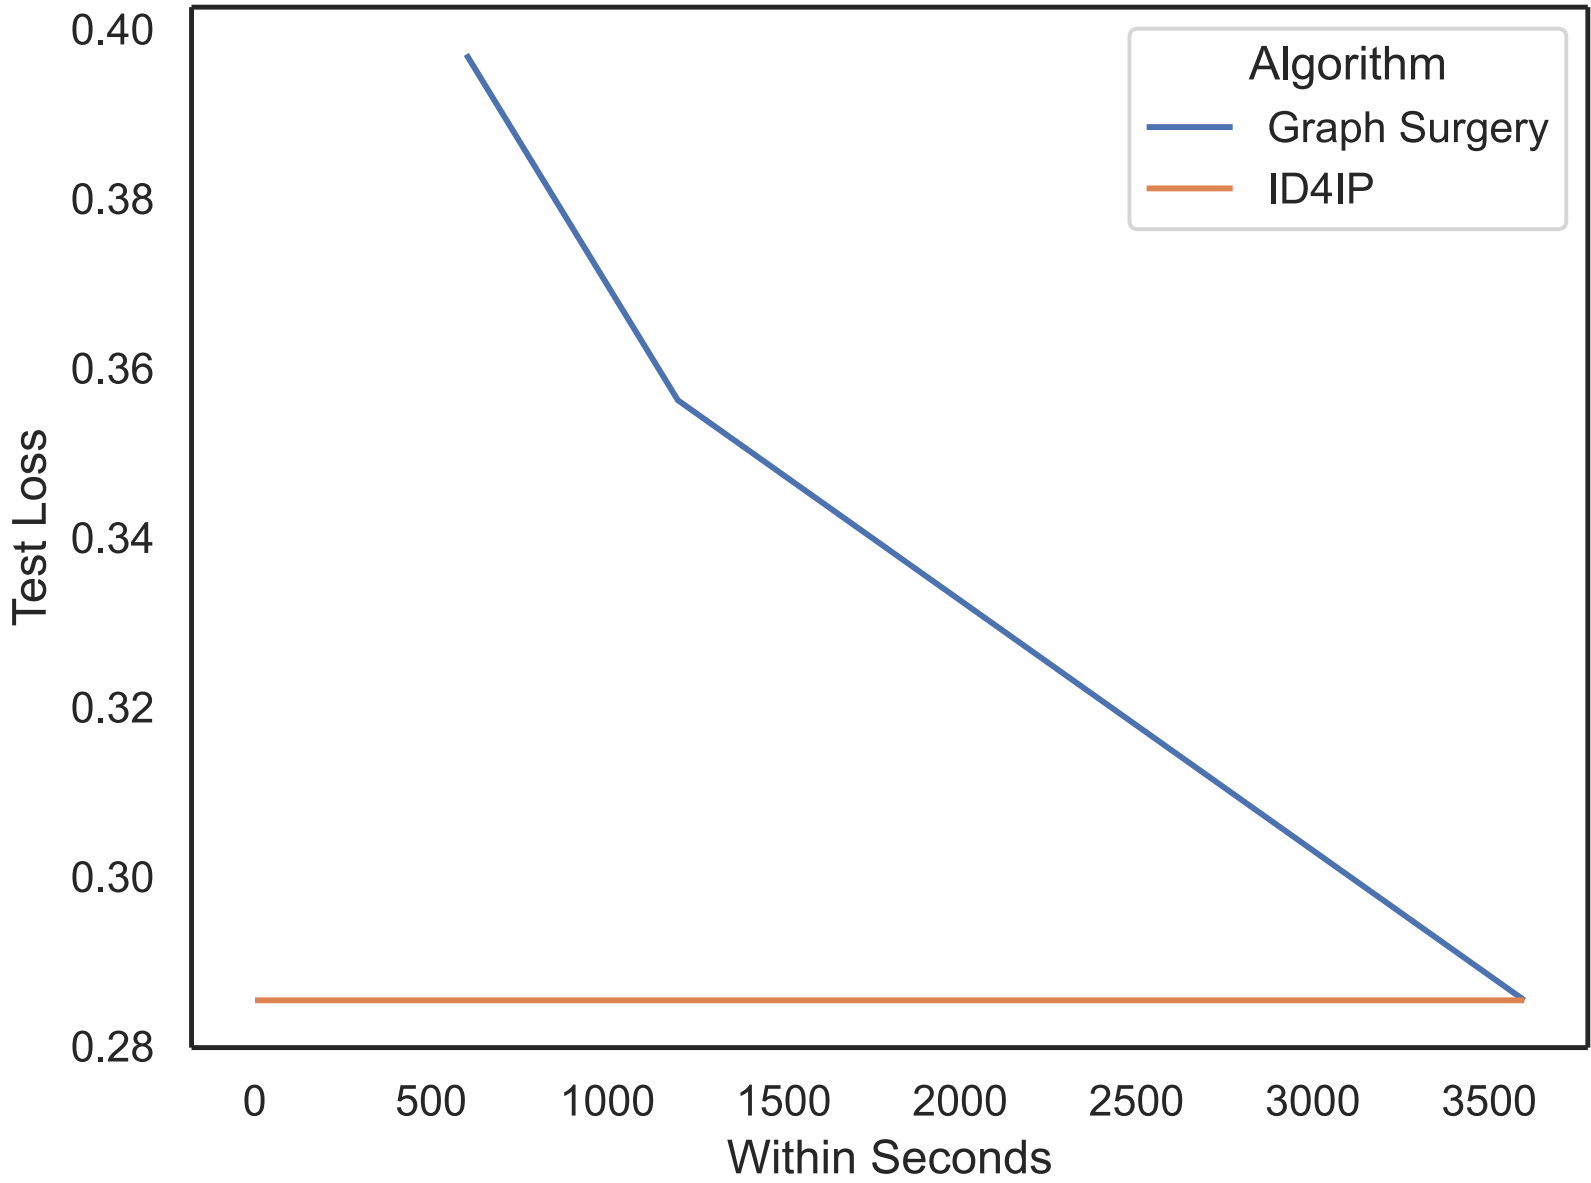

Supplement: supplementary_material [file attachment]
